# Supplementary material for: Nontoxic singlet oxygen generator as a therapeutic candidate for treating tauopathies
Source: PubMed Central journal article supplement (PMC4450544; doi:10.1038/srep10821), 2015-06-01
Supplement: srep10821-s1.pdf [file srep10821-s1.pdf]

**Nontoxic singlet oxygen generator as a therapeutic candidate for treating tauopathies**

Sahabudeen Sheik Mohideen, Yasutoyo Yamasaki, Yasuhiro Omata, Leo Tsuda, Yuji Yoshiike

## Supplementary Figures

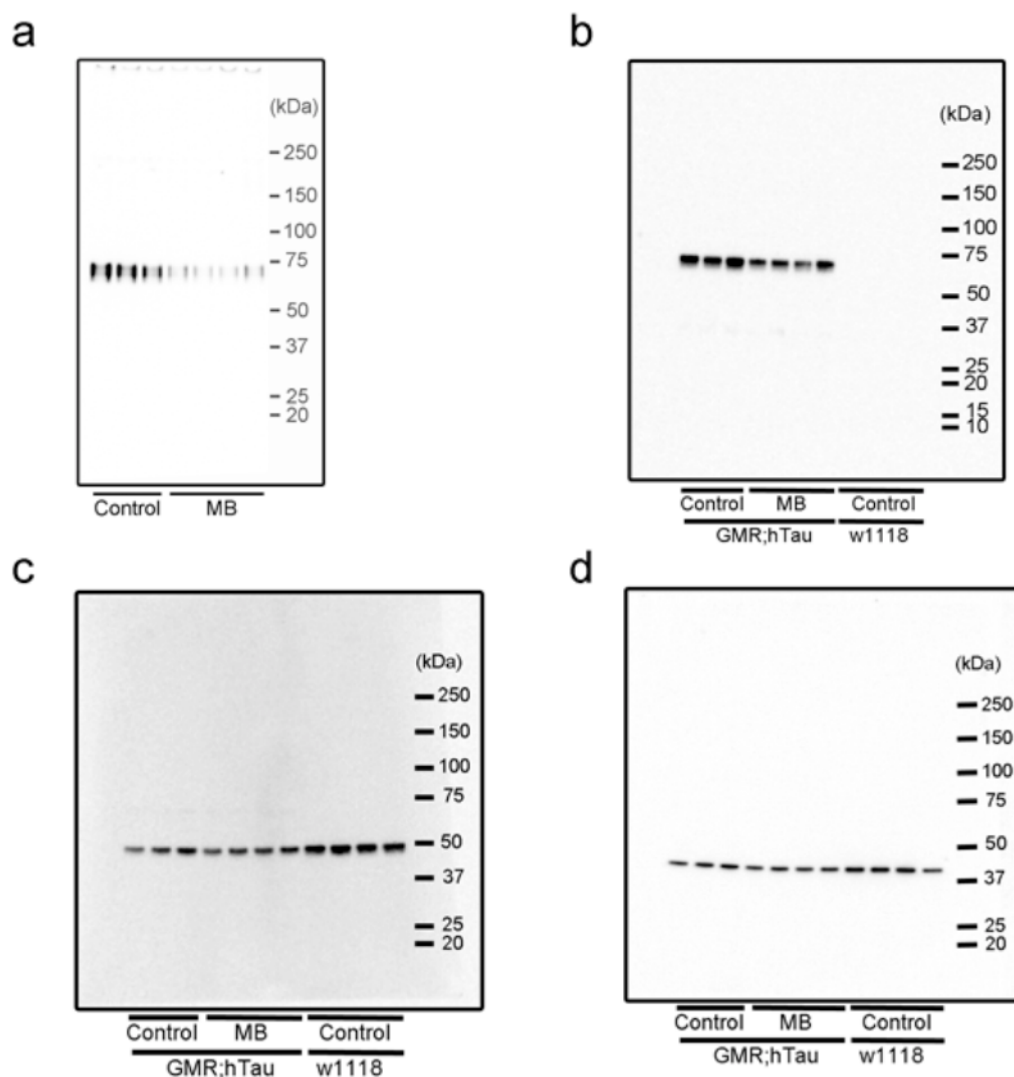

**Supplementary Figure S1.** MB treatment reduces tau levels in sarkosyl-insoluble and TBS-soluble fractions from GMR;hTau flies. After one-month MB (1 mM) treatment, both fractions were prepared from the heads and analyzed by Western blot. (a) Full-length blot of sarkosyl-insoluble fraction probed with JM antibody. (b) Full-length blot of TBS-soluble fraction probed with tau5 antibody. (c) Full-length blot of TBS-soluble fraction probed with Dtau antibody. (d) Full-length blot of TBS-soluble fraction probed with  $\beta$ -actin antibody.

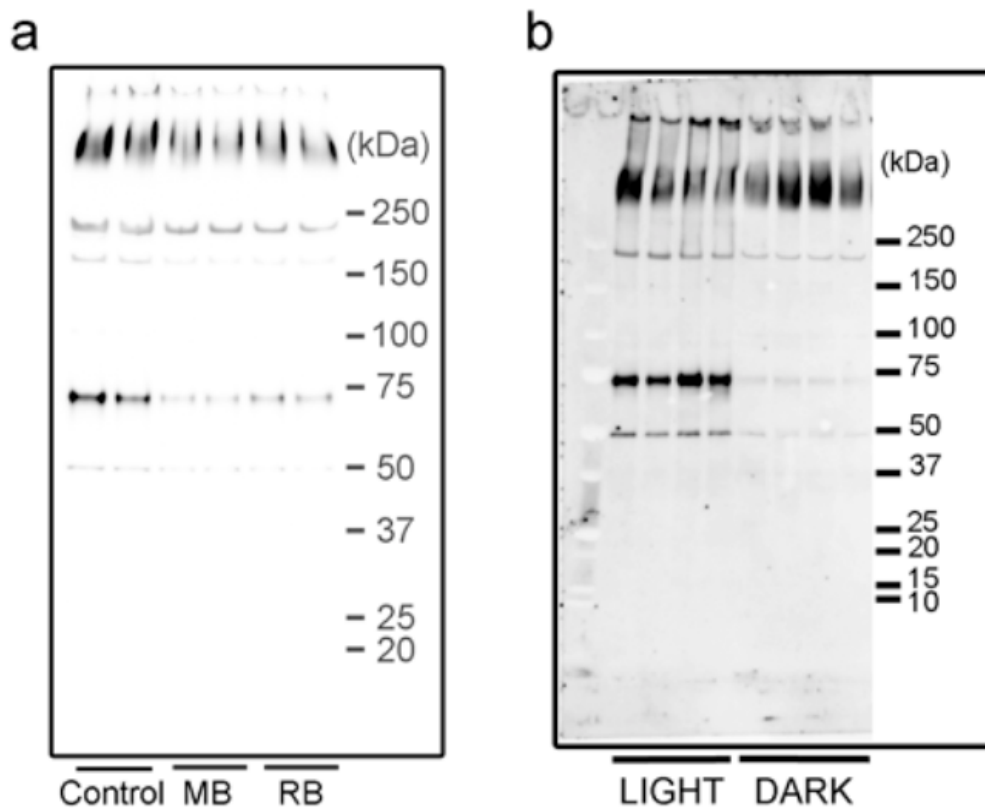

**Supplementary Figure S2.** Compound treatments and light affects tau accumulation in sarkosyl-insoluble fractions from ELAV;hTau flies. (a) Full-length western blot showing JM immunoreactivity of sarkosyl-insoluble fractions derived from the heads of control (untreated), MB-treated, and RB-treated ELAV;hTau flies. (b) Full-length western blot showing JM immunoreactivity of sarkosyl-insoluble fractions derived from the heads of ELAV;hTau flies that were kept in normal “light” (12h:12h) cycle or continuous “dark” condition.

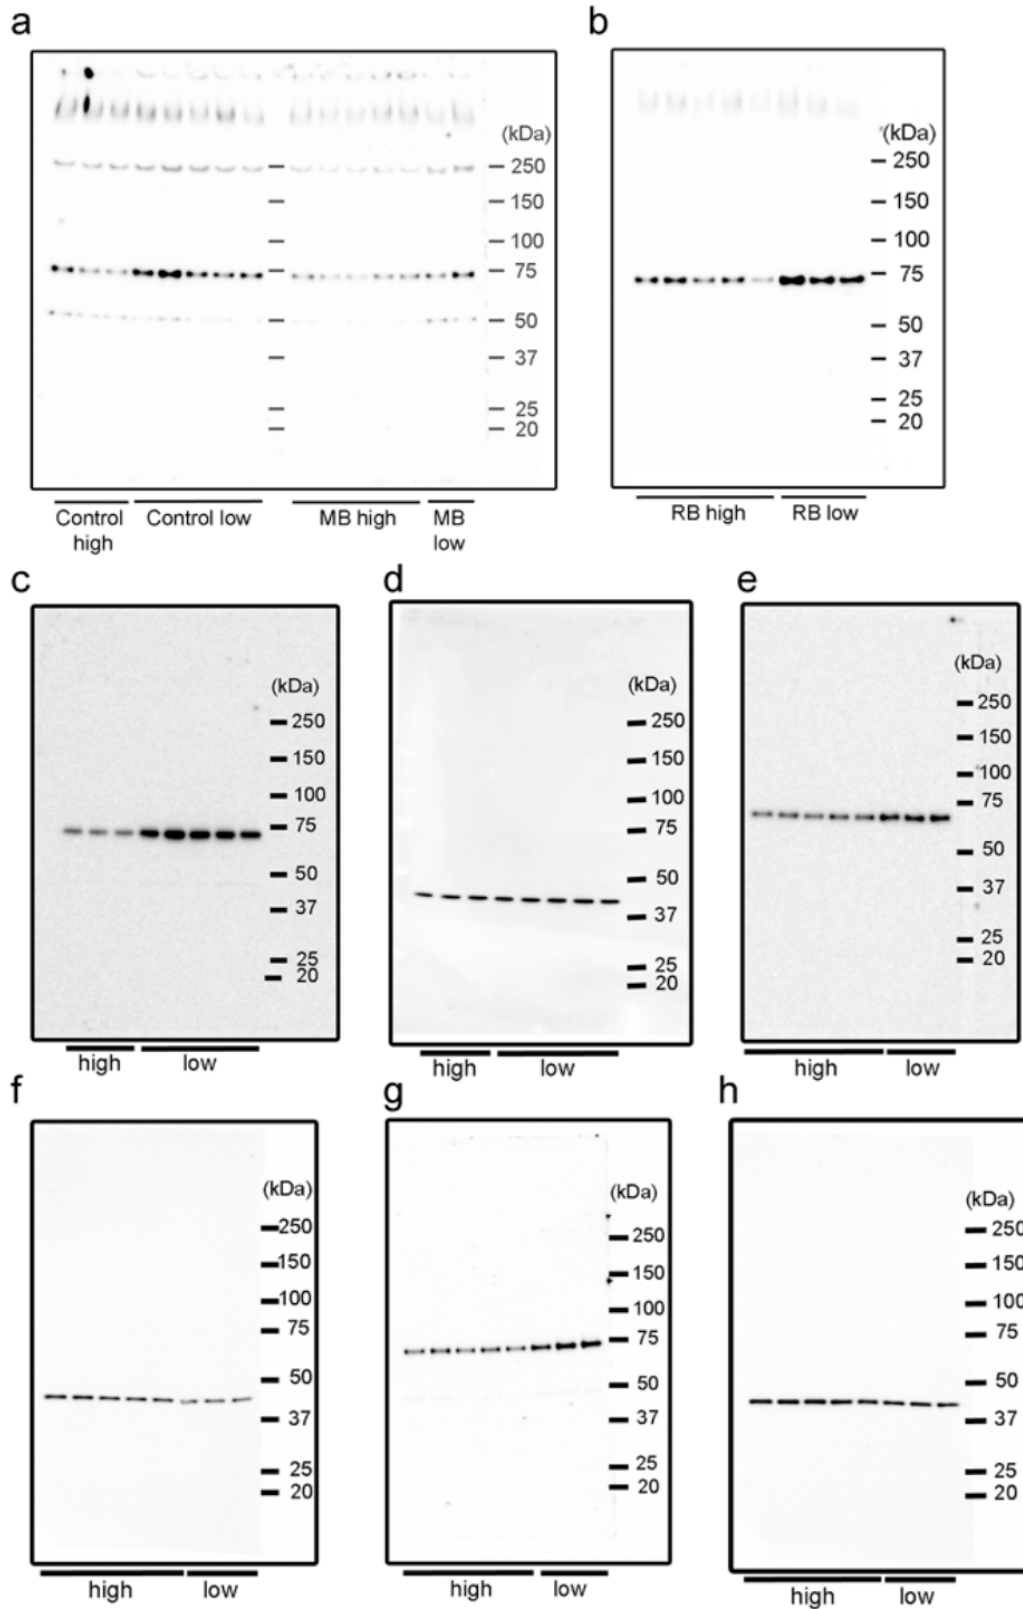

**Supplementary Figure S3.** Climbing deficits in ELAV;hTau flies were correlated with the accumulation of insoluble and soluble tau. Flies that climbed higher than 3 cm from the bottom of the vial (high) and flies that could not climb (low) were

separated and counted before their heads were dissected for biochemical analysis. (a) Full-length western blot of sarkosyl-insoluble fractions from “high” and “low” climbing flies in control untreated and MB-treated groups probed with JM. (b) Full-length western blot of sarkosyl-insoluble fractions from “high” and “low” climbing flies in RB-treated groups probed with JM. (c) Full-length western blot of TBS-soluble fractions from “high” and “low” climbing flies in control untreated group probed with tau5. (d) Full-length western blot of TBS-soluble fractions from “high” and “low” climbing flies in control untreated group probed with  $\beta$ -actin. (e) Full-length western blot of TBS-soluble fractions from “high” and “low” climbing flies in MB-treated group probed with tau5. (f) Full-length western blot of TBS-soluble fractions from “high” and “low” climbing flies in MB-treated group probed with  $\beta$ -actin. (g) Full-length western blot of TBS-soluble fractions from “high” and “low” climbing flies in RB-treated group probed with tau5. (h) Full-length western blot of TBS-soluble fractions from “high” and “low” climbing flies in RB-treated group probed with  $\beta$ -actin.

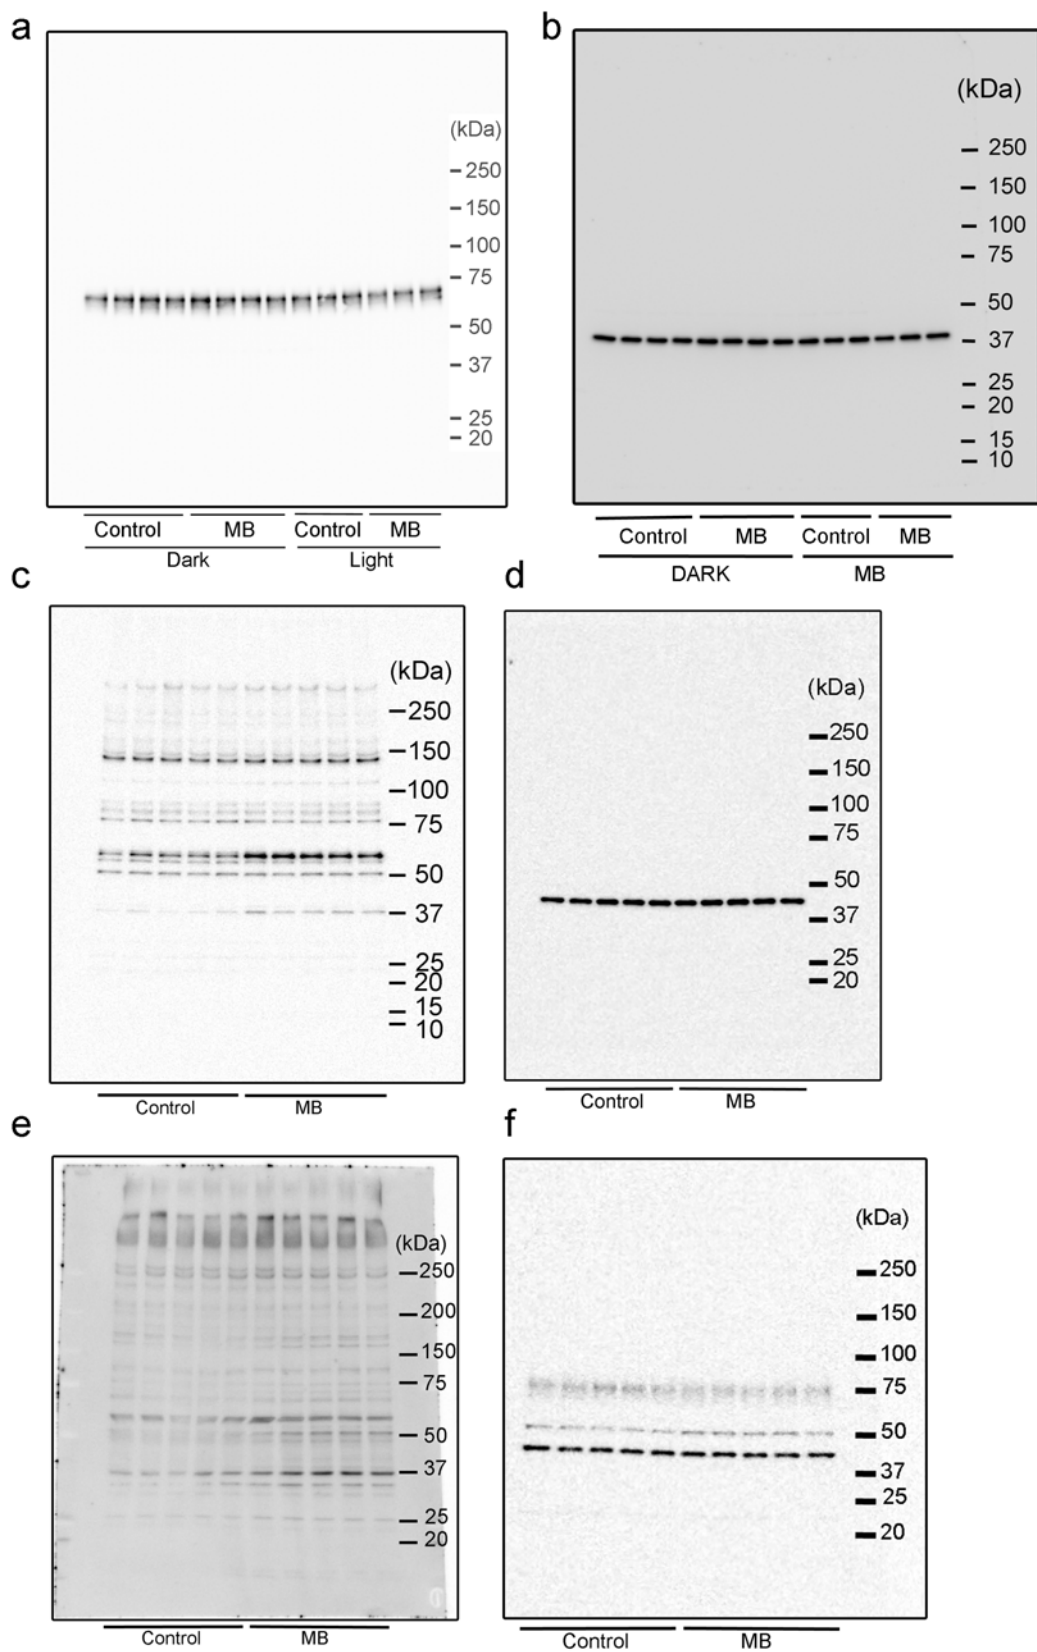

**Supplementary Figure S4.** MB fails to reduce tau in GMR;hTau flies housed under continuously dark condition while MB increases Nrf2 and ATG5 in GMR;hTau flies under normal light cycle condition. GMR;hTau flies were treated with 1 mM MB agar or control agar under either continuous darkness or normal light cycle conditions (12h:12h). After two weeks of treatment, fly heads were dissected and TBS-soluble or RIPA-soluble fractions were analyzed by western blot. (a) Full-length western blot of TBS-soluble fractions probed with tau5. (b) Full-length western blot of TBS-soluble fractions probed with  $\beta$ -actin. (c) Full-length western blot of RIPA-soluble fractions probed with Nrf2. (d) Full-length western blot of RIPA-soluble fractions probed with  $\beta$ -actin. (e) Full-length western blot of TBS-soluble fractions probed with ATG5. (f) Full-length western blot of TBS-soluble fractions probed with  $\beta$ -actin. Samples from (c) to (f) were originated from flies kept under normal light cycle condition.
